# Supplementary material for: Compact and efficient gas diffusion electrodes based on nanoporous alumina membranes for microfuel cells and gas sensors
Source: Royal Society of Chemistry journal article supplement (doi:10.1039/c9an01882d), 2019-10-24
Supplement: c9an01882d1.pdf [file c9an01882d1.pdf]

## Electronic Supplementary Information

### Compact and efficient gas diffusion electrodes based on nanoporous alumina membranes for microfuel cells and gas sensors

Wanda V. Fernandez, Rocío T. Tosello and José L. Fernández\*

*Instituto de Química Aplicada del Litoral (IQAL, CONICET-UNL) and Programa de Electroquímica Aplicada e Ingeniería Electroquímica (PRELINE, Facultad de Ingeniería Química), Universidad Nacional del Litoral, Santiago del Estero 2829, 3000 Santa Fe, Argentina.*

\* E-mail: [jlfernand@fiq.unl.edu.ar](mailto:jlfernand@fiq.unl.edu.ar)

#### S1. Details on contact angle evaluation

Contact angle ( $\theta$ ) measurements were carried out by using a home-made instrument that employed a Hamilton syringe for dispensing 20- $\mu$ L drops and a digital camera Point Grey model BFLY-PGE-05S2M-CS furnished with a magnification lens (6X) for image acquisition. The image processing for calculation of the drop  $\theta$  values was carried out using the free software ImageJ with the Contact Angle plug-in, which allows to identify the drop shape and to calculate  $\theta$  by the ADSA method based on the fitting of the Young-Laplace equation.<sup>1</sup> An example of the processed drop image is shown in Figure S1.

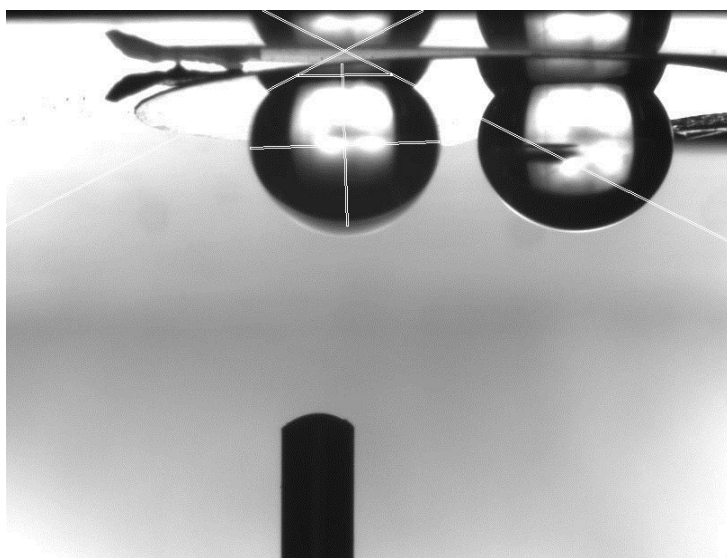

**Figure S1.** Details on contact angle identification and estimation from the drop images.

## S2. Numerical simulations of single-pore gas diffusion electrodes

### S2.a) Introduction

The mathematical model of a single-pore gas diffusion electrode for solving the mass transport of a dissolved species by diffusion coupled to its reaction under diffusion limiting conditions on the electrocatalytic surface is described. The conditions that were used to perform the numerical resolution of this model by the Finite Element Method using COMSOL Multiphysics® are also listed. These calculations were performed to obtain a semi-quantitative perception about the time-response of the electrode current and of the concentration profiles, and how the electrode configuration (allocation of the catalyst layer, partial pore flooding) affects these responses. The understanding of the physics of these phenomena would allow to design membrane-based gas diffusion electrodes that maximize the current densities and response times.

### S2.b) General model

The model was built in a 2D cylindrical geometry with axial symmetry around the pore centre (at radius  $r = 0$ ), where  $r$  and  $z$  are the radial and vertical (normal to the pore surface) coordinates. Thus, the gas/liquid interface at the pore opening was a circular surface centered at the coordinates  $(0,0)$ , with a pore radius  $r_p$ . The electroactive surface was a ring surrounding the circular pore, which extended all the way to the radial boundary of the model ( $r_{max}$ ). The electrolyte solution extended from  $z = 0$  to the vertical boundary ( $z_{max}$ ). In those cases where partial flooding of the pores was considered, the gas/liquid interface was placed at a  $z$  distance slightly below the electrode surface ( $z < 0$ ). The general model is sketched in Figure S2.

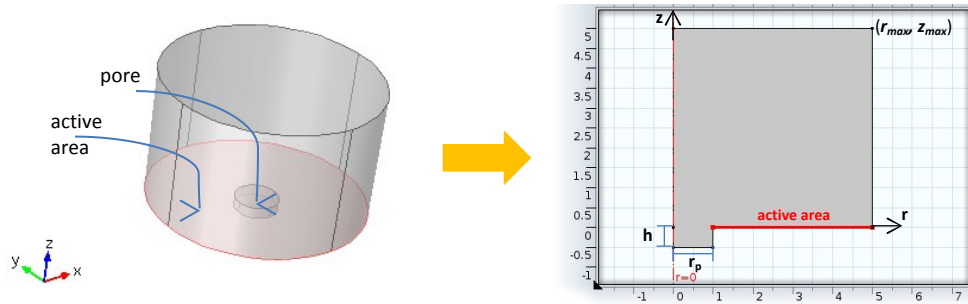

**Figure S2.** 3D representation of the simulated system (left) and its respective 2D model in cylindrical coordinates (right).

In the analyzed process, a reactive gas (which was  $H_2$  in this work) is dissolved in the electrolyte at the gas/liquid interface located at the pore opening. Thus, assuming that the dissolution process ( $H_{2(g)} \rightleftharpoons H_{2(dis)}$ ) is very fast, the concentration of dissolved species in the solution side of this interface ( $C^*$ ) is in equilibrium with the gas phase through Henry Law ( $C^* = p/k_H$ , where  $p$  is the partial pressure and  $k_H$  is the Henry constant). Besides, the concentration of the dissolved species at any coordinate  $(r,z)$  of the solution and at any time  $(t)$ ,  $C(r,z,t)$ , changes due to the mass transport process into the solution. In the presence of a concentration gradient and in the absence of migration and convection, this mass transport is established by the Second Fick's Law, which in cylindrical coordinates  $(r,z)$  is given by eq. (S1), where  $D$  is the diffusion coefficient.<sup>2</sup>

$$\frac{\partial C(r,z,t)}{\partial t} = D \left[ \frac{\partial^2 C(r,z,t)}{\partial r^2} + \left( \frac{1}{r} \right) \frac{\partial C(r,z,t)}{\partial r} + \frac{\partial^2 C(r,z,t)}{\partial z^2} \right] \quad (S1)$$

In terms of the normalized parameters  $R = r/r_p$ ,  $Z = z/r_p$ ,  $\tau = tD/r_p^2$ , and  $c = C/C^*$ , the previous equation results in eq. (S2).

$$\frac{\partial c(R,Z,\tau)}{\partial \tau} = \left[ \frac{\partial^2 c(R,Z,\tau)}{\partial R^2} + \left( \frac{1}{R} \right) \frac{\partial c(R,Z,\tau)}{\partial R} + \frac{\partial^2 c(R,Z,\tau)}{\partial Z^2} \right] \quad (S2)$$

As initially there is no dissolved species into the solution, the initial conditions for solving this differential equation are listed below:

$$\tau = 0; \quad 0 \leq R \leq R_{max}; \quad 0 < Z \leq Z_{max}; \quad c(R,Z,\tau = 0) = 0 \quad (S3-a)$$

$$0 \leq R \leq 1; \quad -H < Z \leq 0; \quad c(R,Z,\tau = 0) = 0 \quad (S3-b)$$

$$0 \leq R \leq 1; \quad Z = 0; \quad c(R,Z,\tau = 0) = 1 \quad (S4-a)$$

$$0 \leq R \leq 1; \quad Z = -H; \quad c(R,Z,\tau = 0) = 1 \quad (S4-b)$$

$$1 < R \leq R_{max}; \quad Z = 0; \quad c(R,Z,\tau = 0) = 0 \quad (S5)$$

The conditions (S3-a) and (S4-a) are applicable to the situation where the pore opening is exactly at the same level than the active surface ( $Z = 0$ ), which is just a particular ideal situation that was analyzed in this work. In the partially flooded pore, condition (S3-b) also applies (where  $H = h/r_p$  and  $h$  is the inundated pore height) in order to take into account the addition of the filled-pore volume, and condition (S4-b) applies at  $Z = -H$  instead of condition (S4-a).

For  $\tau > 0$ , the boundary conditions that apply in each particular case are listed below:

$$\tau > 0; \quad 0 \leq R \leq R_{max}; \quad Z = Z_{max}; \quad c(R,Z,\tau) = 0 \quad (S6)$$

$$R = R_{max}; \quad 0 < Z \leq Z_{max}; \quad c(R,Z,\tau) = 0 \quad (S7)$$

$$0 < R < R_{max}; \quad 0 < Z < Z_{max}; \quad \text{eq. (S2)} \quad (S8-a)$$

$$0 < R < 1; \quad -H < Z \leq 0; \quad \text{eq. (S2)} \quad (S8-b)$$

$$0 \leq R \leq 1; \quad Z = 0; \quad c(R,Z,\tau) = 1 \quad (S9-a)$$

$$0 \leq R \leq 1; \quad Z = -H; \quad c(R,Z,\tau) = 1 \quad (S9-b)$$

Note that in the partially flooded pore, condition (S8-b) is added to (S8-a), while condition (S9-b) replaces (S9-a).

The analyzed reaction at the electroactive surface was the hydrogen oxidation reaction (*hor*), which in acid medium is given by eq. (S10).

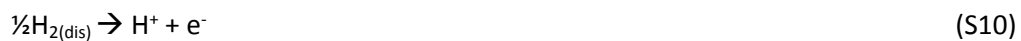

It was assumed that this reaction operated under mass-transport limiting conditions, so the additional boundary condition (S11-a) was applied over the active surface. In some of the analyzed

cases, this condition was also applied on both sides of a ring-shaped catalytic layer that extended over the pore opening with a negligible thickness ( $1/500$ ) and an inner ring radius  $R_o = r_o/r_p$  (i.e. over the range  $R_o < R \leq 1$ ) at  $Z = 0$  (condition (S11-b)), as will be detailed when describing this particular situation.

$$\tau > 0; \quad 1 < R \leq R_{max}; \quad Z = 0: \quad c(R, Z, \tau) = 0 \quad (\text{S11-a})$$

$$\tau > 0; \quad R_o < R \leq R_{max}; \quad Z = 0: \quad c(R, Z, \tau) = 0 \quad (\text{S11-b})$$

Finally, the electrode current ( $i$ ) can be obtained from the surface integral of the normal flux at the electrode surface, given by eq. (S12). In terms of normalized magnitudes, the normalized current ( $I$ ) results from eq. (S13).

$$i = 2\pi F \int_{r_p}^{r_{max}} D \frac{\partial C(r, z, t)}{\partial z} \bigg|_{z=0} r dr \quad (\text{S12})$$

$$I = \frac{i}{FDC^*r_p} = 2\pi \int_1^{R_{max}} \frac{\partial c(R, Z, \tau)}{\partial Z} \bigg|_{Z=0} R dR \quad (\text{S13})$$

### S2.c) Analyzed cases

Three different geometric situations were evaluated for the previously described diffusion/reaction system in cylindrical coordinates, which are schematized in Figure S3. The 2D simulation domain extended between the vertical boundaries  $(0, Z)$  and  $(R_{max}, Z)$ , and the horizontal boundaries  $(R, 0)$  and  $(R, Z_{max})$ . Moreover, for the cases (b) and (c) involving a gas/liquid interface below  $Z = 0$  (recessed gas inlet), an additional domain was introduced, which extended between the vertical boundaries  $(0, Z)$  and  $(1, Z)$ , and the horizontal boundaries  $(R, 0)$  and  $(R, -H)$ . Eq. (S2) was applied all over these domains.

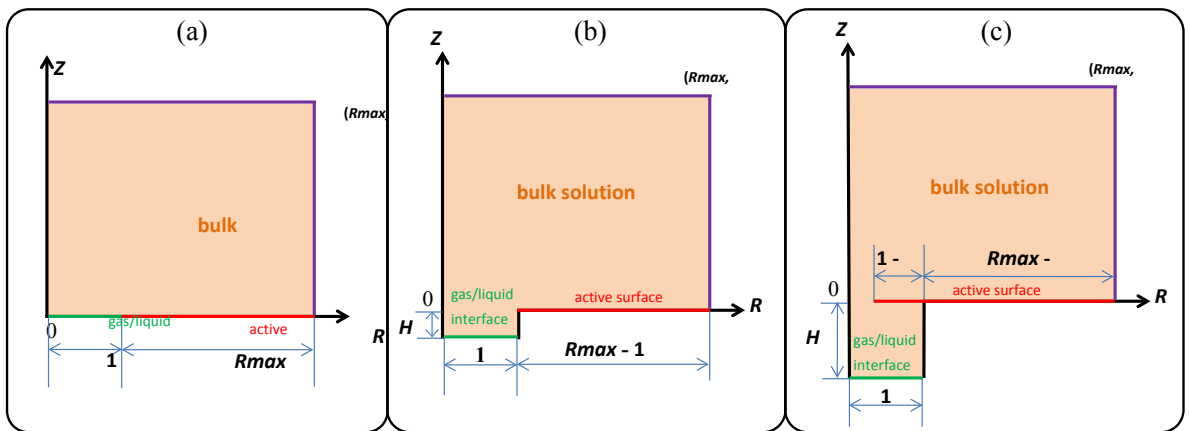

**Figure S3.** Schemes of the three analyzed simulation models. (a) Gas inlet leveled with the electrode surface at  $Z = 0$ . (b) Recessed gas inlet at  $Z = -H$  ( $Z < 0$ ). (c) Recessed gas inlet at  $Z = -H$  with electrocatalytic ring layer at  $Z = 0$  (ring opening radius:  $R_o$ ).

The condition of isolated boundary was applied on the borders ( $0, Z_{max} \leq Z \leq -H$ ) and ( $1, 0 \leq Z \leq -H$ ) (black lines in the schemes of Figure S2). For the lateral and top boundaries (violet lines in the schemes of Figure S3), which are located at ( $R_{max}, Z_{max} \leq Z \leq 0$ ) and ( $0 \leq R \leq R_{max}, Z_{max}$ ), the condition of null and invariable concentration was applied in order to accomplish boundary conditions (S6) and (S7). The simulation domain was large enough to assure that these boundaries are far enough from the concentration gradients, so they have no effects on the results. To guarantee this condition, simulations were performed with increasing values of  $R_{max}$  and  $Z_{max}$  up to an extent where no changes of the results were verified. The condition of null and invariable concentration was also applied on the “active surface” boundary (red line in the schemes of Figure S3), either over ( $1 \leq R \leq R_{max}, 0$ ) or over ( $R_0 \leq R \leq R_{max}, 0$ ), in order to accomplish boundary conditions (S11-a) or (S11-b), respectively. Finally, the condition of invariable concentration ( $c = 1$ ) was applied on the “gas/liquid interface” boundary (green line in the schemes of Figure S3) on the interval ( $0 \leq R \leq 1, 0$ ) or ( $0 \leq R \leq 1, -H$ ), for fulfillment of conditions (S9-a) or (S9-b), respectively.

#### S2.d) Simulations in COMSOL Multiphysics®

For performing simulations of the mass transport and electrode reaction in the described models, these systems were programmed in COMSOL Multiphysics® employing the module *Transport of Diluted Species (chds)*.<sup>3,4</sup> The time-dependent responses obtained from these models were the concentration profiles  $c(R, Z, \tau)$ , the normalized flux density at  $Z = 0$  normal to the surface as a function of  $R$ , and the normalized current  $I(\tau)$  calculated by numerically solving eq. (S13) both over the whole electrode surface and as a function of  $R$ . In fact, the long time responses of time-dependent calculations were compared with the results of calculations at steady state, where the condition given by eq. (S14) was applied. No differences were observed in the values calculated by both procedures, so steady-state calculations were carried out applying this last condition.

$$\frac{\partial c(R, Z, \tau)}{\partial \tau} = 0 = \left[ \frac{\partial^2 c(R, Z, \tau)}{\partial R^2} + \left( \frac{1}{R} \right) \frac{\partial c(R, Z, \tau)}{\partial R} + \frac{\partial^2 c(R, Z, \tau)}{\partial Z^2} \right] \quad (S14)$$

Details on the definition of the geometric model, mesh design, equations and boundary conditions are described in the Appendix at the end of this document. The mesh was refined over the critical zones that involve diffusion and reaction, by choosing a number of elements that guarantee accurate-enough results using reasonable calculation times.<sup>5,6</sup> More precisely, a conventional “fine” mesh size was implemented over the whole simulations domain, excepting around the joint between the pore opening and the active surface, where a pre-defined “extremely fine” mesh domain was applied. Besides, as the flux density at the electrode surface was a target magnitude computed from these calculations, a “distribution meshing” was used over the whole active surface.

### S3. References

- 1 A.F. Stalder, T. Melchior, M. Müller, D. Sage, T. Blu, M. Unser, *Colloids Surf. A*, 2010, **364**, 72.
- 2 A.J. Bard, L.R. Faulkner, *Electrochemical Methods – Fundamentals and Applications*, 2<sup>nd</sup>ed, Wiley, Hoboken, **2001**.

- 3 <http://www.comsol.com>
- 4 Voltammetry at a Microdisk Electrode, <http://www.comsol.com/model/12877>
- 5 I.J. Cutress, E.J.F. Dickinson, R.G. Compton, *J. Electroanal. Chem.*, 2010, **638**, 76.
- 6 A. Lavacchi, U. Bardi, C. Borri, S. Caporali, C. Fossati, I. Perissi, *J. Appl. Electrochem.*, 2009, **39**, 2159.

#### **S4. Appendix**

The program COMSOL 4.3a (License Number 2078045) was used for modeling and solving the systems with normalized parameters as described in Section S2. Two general models were designed to manage the three described cases. The first model was “Diffusion/reaction at an ideal and a fairly flooded pore”, which applied to cases (a) (ideal pore) and (b) (fairly flooded pore). The second model was “Recessed gas inlet with electrocatalytic ring layer”, which applied to case (c) (fairly flooded pore partially or totally covered by an electrocatalytic layer). The global definitions (for both models) and the particular settings for each case are listed below.

# Single-pore gas diffusion/reaction

## 1 Global Definitions

### Global settings

|         |                                             |
|---------|---------------------------------------------|
| Name    | single-pore gas diffusion dimensionless.mph |
| Program | COMSOL 4.3a                                 |

### Used products

|                     |
|---------------------|
| COMSOL Multiphysics |
|---------------------|

## 1.1 Parameters

### Parameters

| Name  | Expression | Description                                             |
|-------|------------|---------------------------------------------------------|
| R     | 5          | Dimensionless maximum radial coordinate                 |
| Z     | 5          | Dimensionless maximum vertical coordinate               |
| a     | 1          | Dimensionless pore radius                               |
| C_H2  | 1          | Dimensionless concentration at the gas/liquid interface |
| D_ad  | 1          | Dimensionless diffusion coefficient                     |
| h_p   | 0 to 2     | Dimensionless pore penetration                          |
| top   | 0 to 1     | Dimensionless width of catalyst layer on pore           |
| h_top | 1/500      | Dimensionless height of catalyst layer                  |

## 1.2 Variables

### 1.2.1 Variables

#### Selection

|                        |              |
|------------------------|--------------|
| Geometric entity level | Entire model |
|------------------------|--------------|

| Name | Expression                   | Description |
|------|------------------------------|-------------|
| I    | mod1.intop1(intcpl_source_l) |             |

## 2 Model 1 for cases (a) and (b) – Diffusion/reaction at an ideal and a fairly flooded pore (mod1)

## 2.2 Definitions

### 2.2.1 Variables

#### 2.2.1.1 Variables 2

#### Selection

|                        |              |
|------------------------|--------------|
| Geometric entity level | Entire model |
|------------------------|--------------|

| Name            | Expression                                          | Description |
|-----------------|-----------------------------------------------------|-------------|
| intcpl_source_l | $2 \cdot \pi \cdot r \cdot \text{chds.dfluxz\_ch2}$ |             |

2.2.2 Model Couplings

2.2.2.1 Integration 1

|               |             |
|---------------|-------------|
| Coupling type | Integration |
| Operator name | intop1      |

Source selection

|                        |           |
|------------------------|-----------|
| Geometric entity level | Boundary  |
| Selection              | Boundary6 |

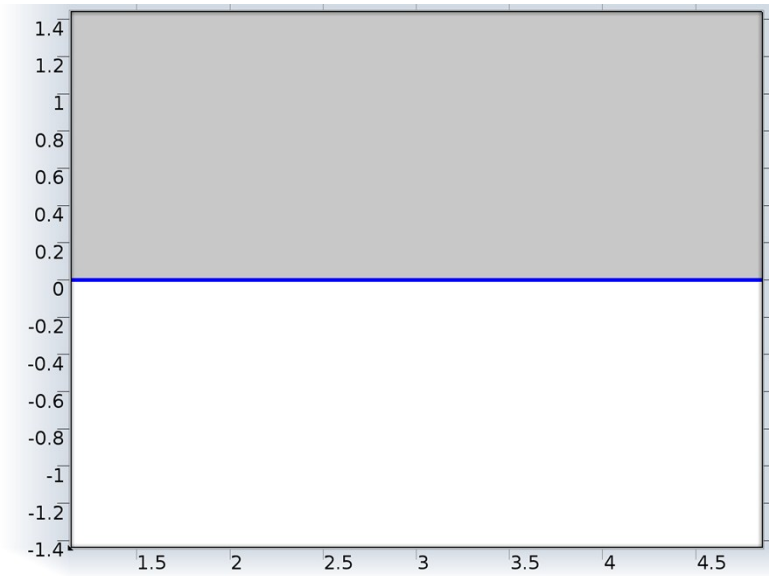

Source selection

2.3 Geometry 1

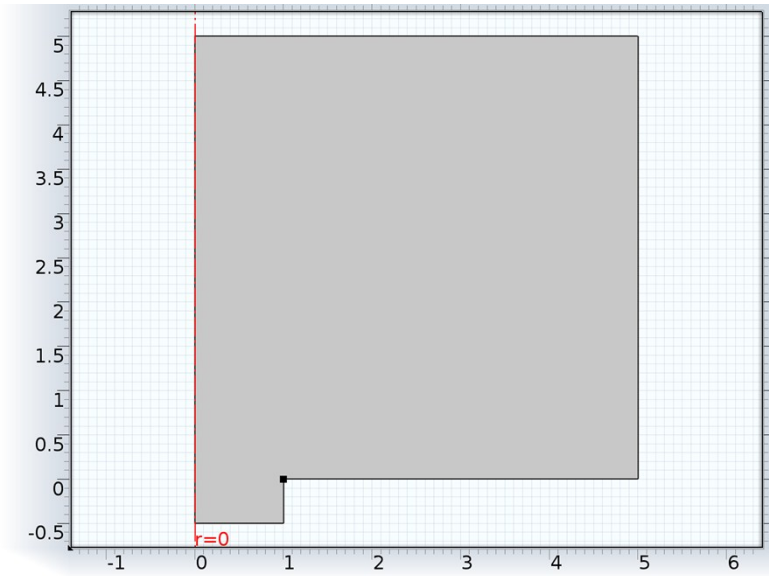

Geometry 1

Geometry statistics

| Property        | Value |
|-----------------|-------|
| Space dimension | 2     |



| Property             | Value                                             |
|----------------------|---------------------------------------------------|
| Number of domains    | 1                                                 |
| Number of boundaries | 5 for case (a) where $-h_p = 0$<br>7 for case (b) |

### 2.3.1 Point 1 (pt1)

Selections of resulting entities

| Name             | Value  |
|------------------|--------|
| Point coordinate | {a, 0} |

### 2.3.2 Bézier Polygon 1 (b1)

Polygon segments

| Name                     | Value                                                    |
|--------------------------|----------------------------------------------------------|
| Control points           | {{0, 0, R, R, a, a, 0}, {0, Z, Z, 0, 0, -h_p, -h_p}}     |
| Degree                   | {1, 1, 1, 1, 1, 1}                                       |
| Weights                  | {1, 1, 1, 1, 1, 1, 1, 1, 1, 1, 1}                        |
| Valid vertex coordinates | {{0, 0}, {0, 5}, {5, 5}, {5, 0}, {1, 0}, {1, 0}, {0, 0}} |

## 2.4 Transport of Diluted Species (chds)

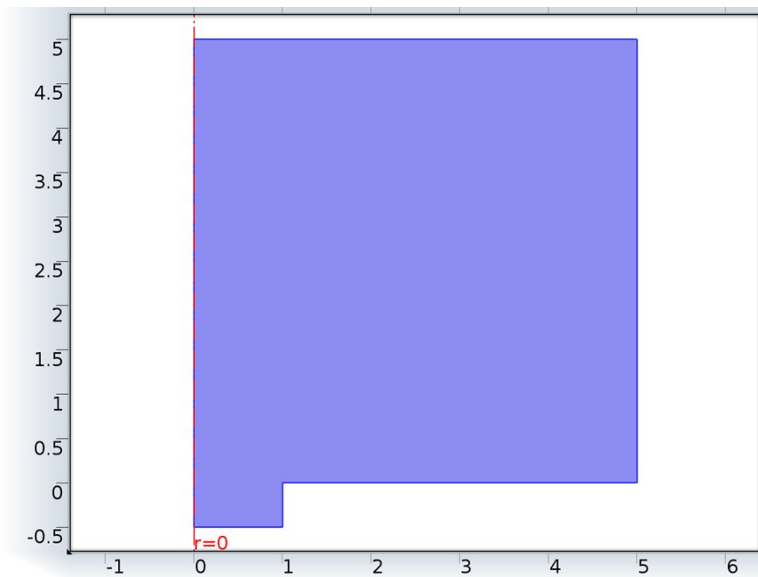

*Transport of Diluted Species*

Selection

|                        |          |
|------------------------|----------|
| Geometric entity level | Domain   |
| Selection              | Domain 1 |

Equations

$$\frac{\partial c_i}{\partial t} + \nabla \cdot (-D_i \nabla c_i) = R_i$$

$$\mathbf{N}_i = -D_i \nabla c_i$$

### Settings

| Description                                          | Value                   |
|------------------------------------------------------|-------------------------|
| Concentration                                        | Linear                  |
| Compute boundary fluxes                              | 1                       |
| Apply smoothing to boundary fluxes                   | 1                       |
| Value type when using splitting of complex variables | Real                    |
| Equation form                                        | Study controlled        |
| Migration in electric field                          | 0                       |
| Convection                                           | 0                       |
| Convective term                                      | Non - conservative form |
| Equation residual                                    | Approximate residual    |
| Stream line diffusion                                | 1                       |
| Cross wind diffusion                                 | 1                       |
| Cross wind diffusion type                            | Do Carmo and Galeão     |
| Enable space-dependent physics interfaces            | 0                       |
| Show equation assuming                               | std1/time               |

### 2.4.1 Diffusion

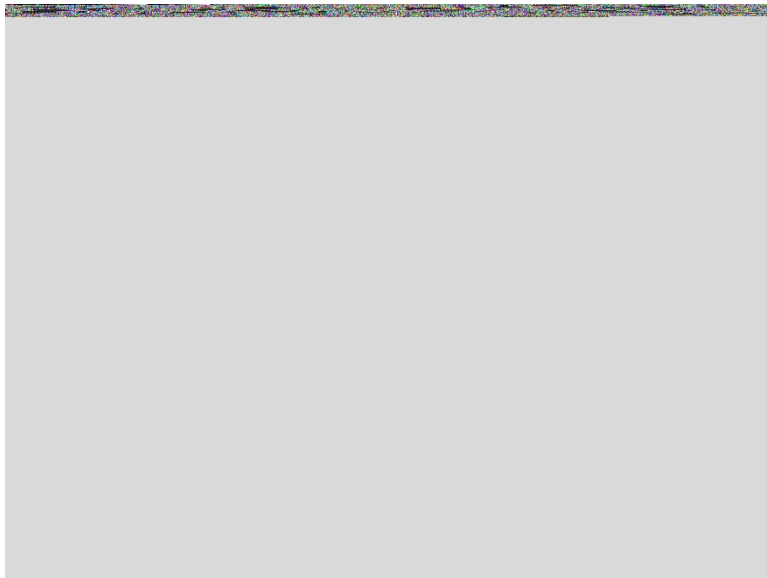

#### Diffusion

#### Selection

|                        |          |
|------------------------|----------|
| Geometric entity level | Domain   |
| Selection              | Domain 1 |

#### Equations

$$\frac{\partial c_i}{\partial t} + \nabla \cdot (-D_i \nabla c_i) = R_i$$

.....

$$\mathbf{N}_i = -D_i \nabla c_i$$

#### 2.4.1.1 Settings

#### Settings

| Description    | Value        |
|----------------|--------------|
| Velocity field | User defined |
| Velocity field | {0, 0, 0}    |

| Description           | Value                                      |
|-----------------------|--------------------------------------------|
| Electric potential    | User defined                               |
| Electric potential    | 0                                          |
| Diffusion coefficient | User defined                               |
| Diffusion coefficient | {{D_ad, 0, 0}, {0, D_ad, 0}, {0, 0, D_ad}} |
| Bulk material         | None                                       |

#### 2.4.1.2 Variables

| Name              | Expression                                                              | Description                             | Selection      |
|-------------------|-------------------------------------------------------------------------|-----------------------------------------|----------------|
| chds.Drr_ch2      | D_ad                                                                    | Diffusion coefficient, rr component     | Domain 1       |
| chds.Dphir_ch2    | 0                                                                       | Diffusion coefficient, phir component   | Domain 1       |
| chds.Dzr_ch2      | 0                                                                       | Diffusion coefficient, zr component     | Domain 1       |
| chds.Drphi_ch2    | 0                                                                       | Diffusion coefficient, rphi component   | Domain 1       |
| chds.Dphiphi_ch2  | D_ad                                                                    | Diffusion coefficient, phiphi component | Domain 1       |
| chds.Dzphi_ch2    | 0                                                                       | Diffusion coefficient, zphi component   | Domain 1       |
| chds.Drz_ch2      | 0                                                                       | Diffusion coefficient, rz component     | Domain 1       |
| chds.Dphiz_ch2    | 0                                                                       | Diffusion coefficient, phiz component   | Domain 1       |
| chds.Dzz_ch2      | D_ad                                                                    | Diffusion coefficient, zz component     | Domain 1       |
| chds.Dav_ch2      | $0.5 * (chds.Drr\_ch2 + chds.Dzz\_ch2)$                                 | Average diffusion coefficient           | Domain 1       |
| chds.tfluxr_ch2   | $-chds.Drr\_ch2 * cH2r - chds.Drz\_ch2 * cH2z$                          | Total flux, r component                 | Domain 1       |
| chds.tfluxphi_ch2 | $-chds.Dphir\_ch2 * cH2r - chds.Dphiz\_ch2 * cH2z$                      | Total flux, phi component               | Domain 1       |
| chds.tfluxz_ch2   | $-chds.Dzr\_ch2 * cH2r - chds.Dzz\_ch2 * cH2z$                          | Total flux, z component                 | Domain 1       |
| chds.dfluxr_ch2   | $-chds.Drr\_ch2 * cH2r - chds.Drz\_ch2 * cH2z$                          | Diffusive flux, r component             | Domain 1       |
| chds.dfluxphi_ch2 | $-chds.Dphir\_ch2 * cH2r - chds.Dphiz\_ch2 * cH2z$                      | Diffusive flux, phi component           | Domain 1       |
| chds.dfluxz_ch2   | $-chds.Dzr\_ch2 * cH2r - chds.Dzz\_ch2 * cH2z$                          | Diffusive flux, z component             | Domain 1       |
| chds.gradr_ch2    | cH2r                                                                    | Concentration gradient, r component     | Domain 1       |
| chds.gradphi_ch2  | 0                                                                       | Concentration gradient, phi component   | Domain 1       |
| chds.gradz_ch2    | cH2z                                                                    | Concentration gradient, z component     | Domain 1       |
| chds.ntflux_ch2   | chds.bndFlux_ch2                                                        | Normal total flux                       | Boundaries 1–5 |
| chds.ndflux_ch2   | chds.bndFlux_ch2                                                        | Normal diffusive flux                   | Boundaries 1–5 |
| chds.dfluxMag_ch2 | $\sqrt{chds.dfluxr\_ch2^2 + chds.dfluxphi\_ch2^2 + chds.dfluxz\_ch2^2}$ | Diffusive flux                          | Domain 1       |

| Name              | Expression                                                                                                                        | Description                  | Selection      |
|-------------------|-----------------------------------------------------------------------------------------------------------------------------------|------------------------------|----------------|
|                   | $\text{CH2}^2 + \text{chds.dfluxz\_CH2}^2$                                                                                        | magnitude                    |                |
| chds.tfluxMag_CH2 | $\sqrt{\text{chds.tfluxr\_CH2}^2 + \text{chds.tfluxphi\_CH2}^2 + \text{chds.tfluxz\_CH2}^2}$                                      | Total flux magnitude         | Domain 1       |
| chds.Res_CH2      | $\text{CH2t} - \text{chds.R\_CH2}$                                                                                                | Equation residual            | Domain 1       |
| domflux.CH2r      | chds.dfluxr_CH2                                                                                                                   | Domain flux                  | Domain 1       |
| domflux.CH2z      | chds.dfluxphi_CH2                                                                                                                 | Domain flux                  | Domain 1       |
| chds.nrc          | $\text{root.nrc} / \sqrt{\text{root.nrc}^2 + \text{root.nzc}^2 + \text{eps}}$                                                     | Normal vector, r component   | Boundaries 1–5 |
| chds.nphic        | 0                                                                                                                                 | Normal vector, phi component | Boundaries 1–5 |
| chds.nzc          | $\text{root.nzc} / \sqrt{\text{root.nrc}^2 + \text{root.nzc}^2 + \text{eps}}$                                                     | Normal vector, z component   | Boundaries 1–5 |
| chds.bndFlux_CH2  | $\text{if}(r > 0.0010 / \sqrt{\text{mean}(\text{emetric2})}) , -0.5 * \text{dflux\_spatial}(\text{CH2}) / (r * \pi), \text{NaN})$ | Boundary flux                | Boundaries 1–5 |

### 2.4.1.3 Shape functions

| Name | Shapefunction     | Unit | Description   | Shapeframe | Selection |
|------|-------------------|------|---------------|------------|-----------|
| CH2  | Lagrange (Linear) |      | Concentration | Material   | Domain 1  |

### 2.4.1.4 Weak expressions

| Weakexpression                                                                                                                                                                                                                                                              | Integrationframe | Selection |
|-----------------------------------------------------------------------------------------------------------------------------------------------------------------------------------------------------------------------------------------------------------------------------|------------------|-----------|
| $2 * (-d(\text{CH2}, t) * \text{test}(\text{CH2}) - (\text{chds.Drr\_CH2} * \text{CH2r} + \text{chds.Drz\_CH2} * \text{CH2z}) * \text{test}(\text{CH2r}) - (\text{chds.Dzr\_CH2} * \text{CH2r} + \text{chds.Dzz\_CH2} * \text{CH2z}) * \text{test}(\text{CH2z})) * \pi * r$ | Material         | Domain 1  |
| $2 * \text{chds.streamline} * \pi * r$                                                                                                                                                                                                                                      | Material         | Domain 1  |
| $2 * \text{chds.crosswind} * \pi * r$                                                                                                                                                                                                                                       | Material         | Domain 1  |

## 2.4.2 Axial Symmetry 1

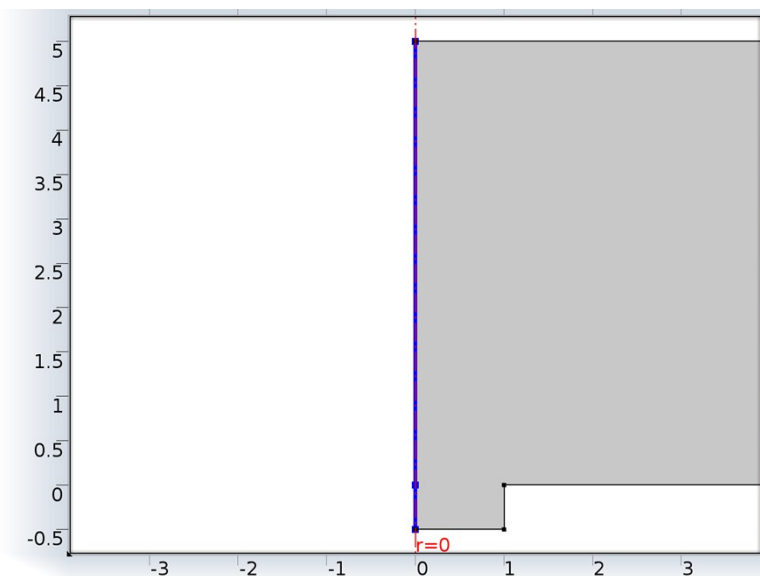

Axial Symmetry 1

### Selection

|                        |               |
|------------------------|---------------|
| Geometric entity level | Boundary      |
| Selection              | Boundary 1, 3 |

2.4.3 No Flux 1

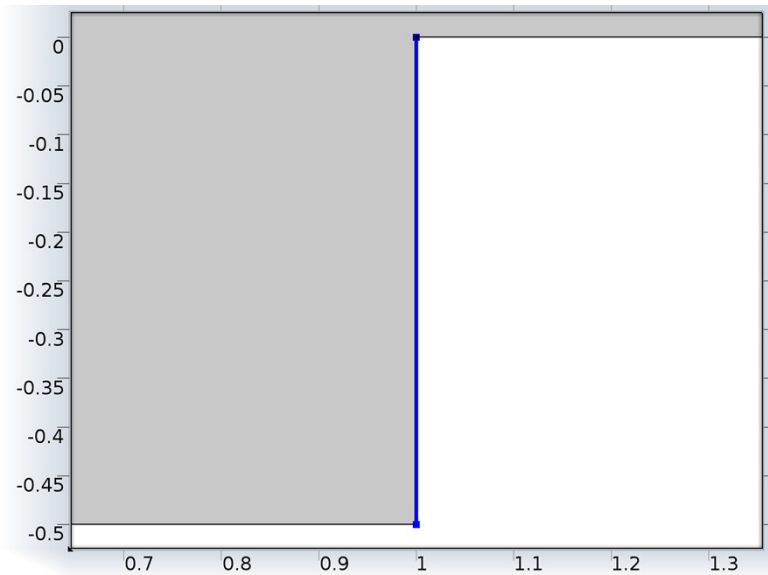

No Flux 1

Selection

|                        |            |
|------------------------|------------|
| Geometric entity level | Boundary   |
| Selection              | Boundary 5 |

Equations

$$-\mathbf{n} \cdot \mathbf{N}_i = 0$$

2.4.3.1 Settings

Settings

| Description           | Value                 |
|-----------------------|-----------------------|
| Apply for all species | Apply for all species |

2.4.4 Initial Values 1

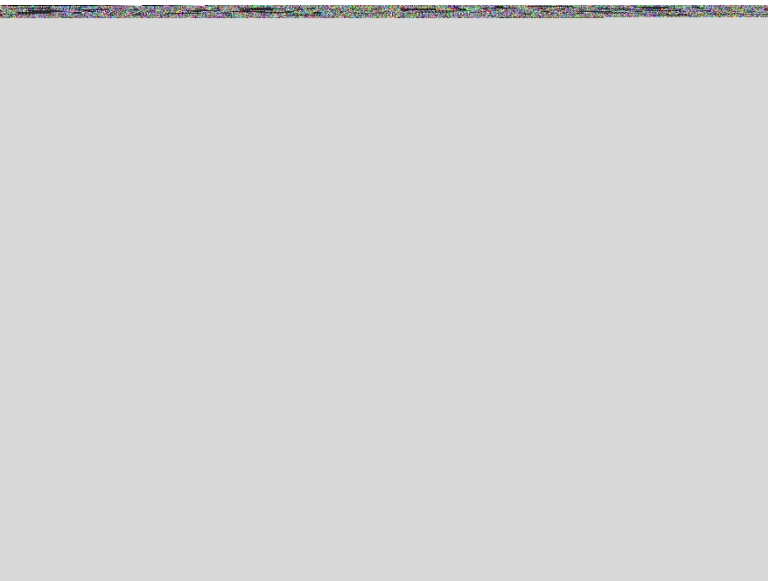

Initial Values 1

#### Selection

|                        |          |
|------------------------|----------|
| Geometric entity level | Domain   |
| Selection              | Domain 1 |

#### 2.4.4.1 Settings

##### Settings

| Description   | Value |
|---------------|-------|
| Concentration | 0     |

#### 2.4.5 Concentration 1

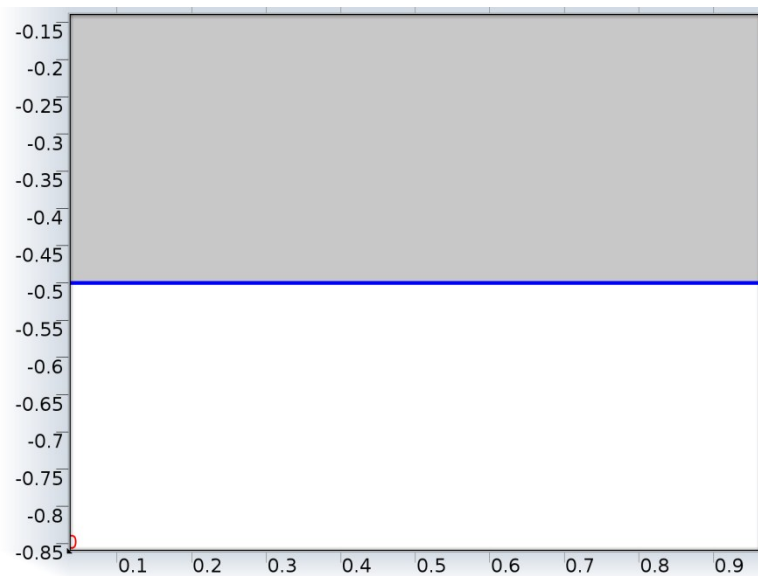

##### Concentration 1

#### Selection

|                        |            |
|------------------------|------------|
| Geometric entity level | Boundary   |
| Selection              | Boundary 2 |

#### Equations

$$c_i = c_{0i}$$

#### 2.4.5.1 Settings

##### Settings

| Description             | Value                   |
|-------------------------|-------------------------|
| Concentration           | 1                       |
| Species ch2             | 1                       |
| Apply reaction terms on | All physics (symmetric) |
| Use weak constraints    | 0                       |

#### 2.4.5.2 Variables

| Name        | Expression | Unit | Description   | Selection  |
|-------------|------------|------|---------------|------------|
| chds.c0_ch2 | 1          |      | Concentration | Boundary 2 |

#### 2.4.5.3 Constraints

| Constraint       | Constraint force       | Shape function    | Selection  |
|------------------|------------------------|-------------------|------------|
| -ch2+chds.c0_ch2 | test(-ch2+chds.c0_ch2) | Lagrange (Linear) | Boundary 2 |

2.4.6 Concentration 2

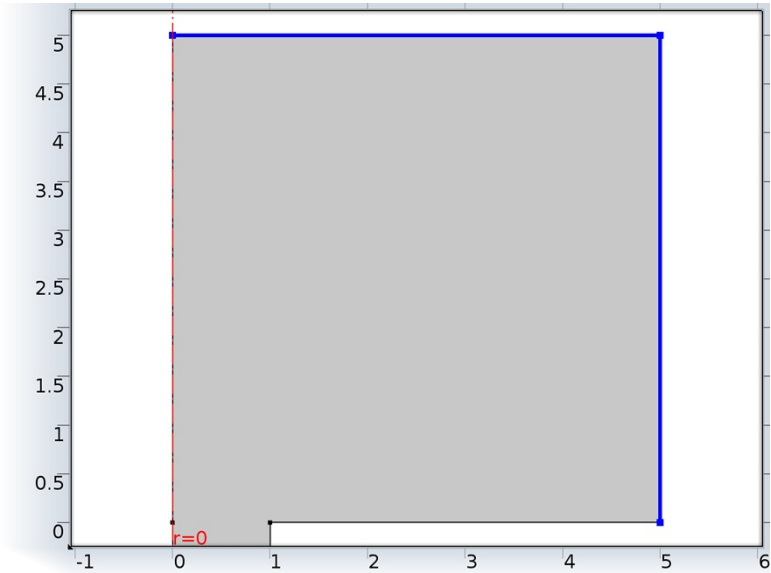

Concentration 2

Selection

|                        |                 |
|------------------------|-----------------|
| Geometric entity level | Boundary        |
| Selection              | Boundaries 4, 7 |

Equations

$$c_i = c_{0i}$$

2.4.6.1 Settings

Settings

| Description             | Value                   |
|-------------------------|-------------------------|
| Concentration           | 0                       |
| Species cH2             | 1                       |
| Apply reaction terms on | All physics (symmetric) |
| Use weak constraints    | 0                       |

2.4.6.2 Variables

| Name        | Expression | Unit | Description   | Selection       |
|-------------|------------|------|---------------|-----------------|
| chds.c0_ch2 | 0          |      | Concentration | Boundaries 4, 7 |

2.4.6.3 Constraints

| Constraint       | Constraint force       | Shape function    | Selection       |
|------------------|------------------------|-------------------|-----------------|
| -cH2+chds.c0_ch2 | test(-cH2+chds.c0_ch2) | Lagrange (Linear) | Boundaries 4, 7 |

### 2.4.7 Concentration 3

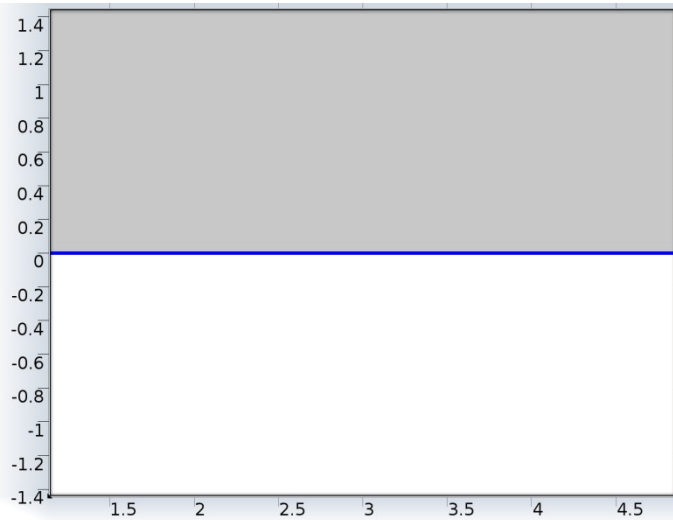

Concentration 3

#### Selection

|                        |           |
|------------------------|-----------|
| Geometric entity level | Boundary  |
| Selection              | Boundary6 |

#### Equations

$$c_i = c_{0i}$$

#### 2.4.7.1 Settings

##### Settings

| Description             | Value                   |
|-------------------------|-------------------------|
| Concentration           | 0                       |
| Species cH2             | 1                       |
| Apply reaction terms on | All physics (symmetric) |
| Use weak constraints    | 0                       |

#### 2.4.7.2 Variables

| Name        | Expression | Unit | Description   | Selection  |
|-------------|------------|------|---------------|------------|
| chds.c0_ch2 | 0          |      | Concentration | Boundary 6 |

#### 2.4.7.3 Constraints

| Constraint       | Constraint forcé       | Shape function    | Selection  |
|------------------|------------------------|-------------------|------------|
| -cH2+chds.c0_ch2 | test(-cH2+chds.c0_ch2) | Lagrange (Linear) | Boundary 6 |

## 2.5 Mesh 1

#### Mesh statistics

| Property                | Value  |
|-------------------------|--------|
| Minimum element quality | 0.724  |
| Average element quality | 0.9549 |
| Triangular elements     | 2291   |
| Edge elements           | 199    |
| Vertex elements         | 7      |



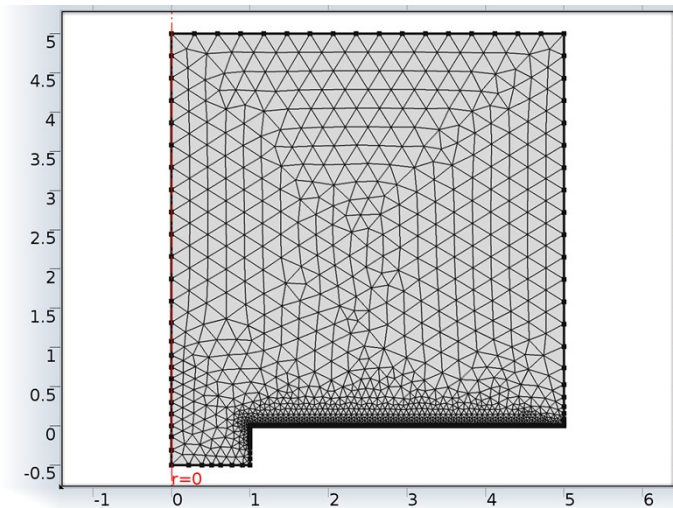

Mesh 1

### 2.5.1 Size (size)

#### Settings

| Name                        | Value   |
|-----------------------------|---------|
| Maximum element size        | 0.292   |
| Minimum element size        | 0.00165 |
| Resolution of curvature     | 0.3     |
| Maximum element growth rate | 1.3     |
| Predefined size             | Fine    |

### 2.5.2 Free Triangular 1 (ftri1)

#### Selection

|                        |           |
|------------------------|-----------|
| Geometric entity level | Domain    |
| Selection              | Remaining |

#### 2.5.2.1 Size 1 (size1)

#### Selection

|                        |         |
|------------------------|---------|
| Geometric entity level | Point   |
| Selection              | Point 5 |

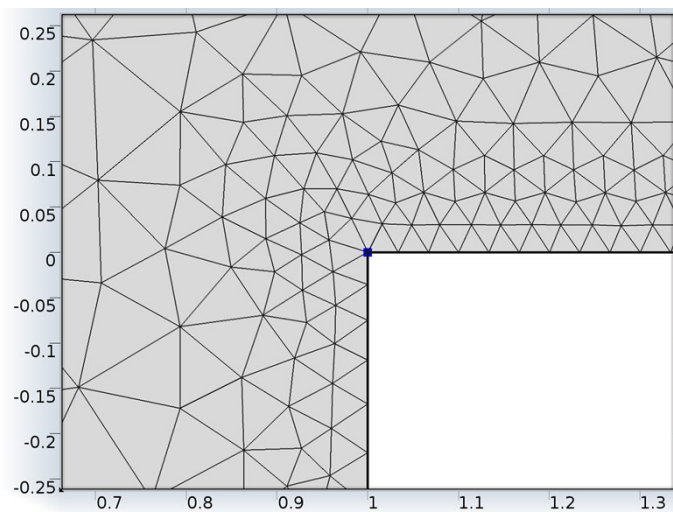

Size 1

#### Settings

| Name                    | Value          |
|-------------------------|----------------|
| Maximum element size    | 0.055          |
| Minimum element size    | 1.0E-4         |
| Resolution of curvature | 0.2            |
| Predefined size         | Extremely fine |

#### 2.5.2.2 Distribution 1 (dis1)

##### Selection

|                        |           |
|------------------------|-----------|
| Geometric entity level | Boundary  |
| Selection              | Boundary6 |

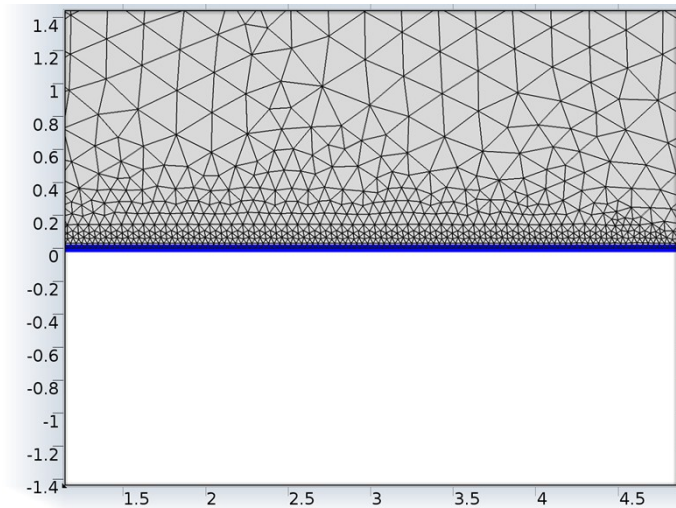

#### Distribution 1

##### Settings

| Name                    | Value                        |
|-------------------------|------------------------------|
| Distribution properties | Predefined distribution type |
| Number of elements      | 120                          |
| Distribution method     | Geometric sequence           |

### 3 Model 2 for case (c) - Recessed gas inlet with electrocatalytic ring layer (mod1)

#### 3.1 Definitions

##### 3.1.1 Variables

##### 3.1.1.1 Variables 2

##### Selection

|                        |              |
|------------------------|--------------|
| Geometric entity level | Entire model |
|------------------------|--------------|

| Name            | Expression                                          | Description |
|-----------------|-----------------------------------------------------|-------------|
| intcpl_source_l | $2 \cdot \pi \cdot r \cdot \text{chds.dfluxz\_CH2}$ |             |

### 3.1.2 Model Couplings

#### 3.1.2.1 Integration 1

|               |             |
|---------------|-------------|
| Coupling type | Integration |
| Operator name | intop1      |

##### Source selection

|                        |             |
|------------------------|-------------|
| Geometric entity level | Boundary    |
| Selection              | Boundary 10 |

### 3.1.3 Coordinate Systems

#### 3.1.3.1 Boundary System 1

|                        |                 |
|------------------------|-----------------|
| Coordinate system type | Boundary system |
| Identifier             | sys1            |

##### Settings

| Name                                | Value            |
|-------------------------------------|------------------|
| Coordinate names                    | {t1, to, n}      |
| Create first tangent direction from | Global Cartesian |

## 3.2 Geometry 1

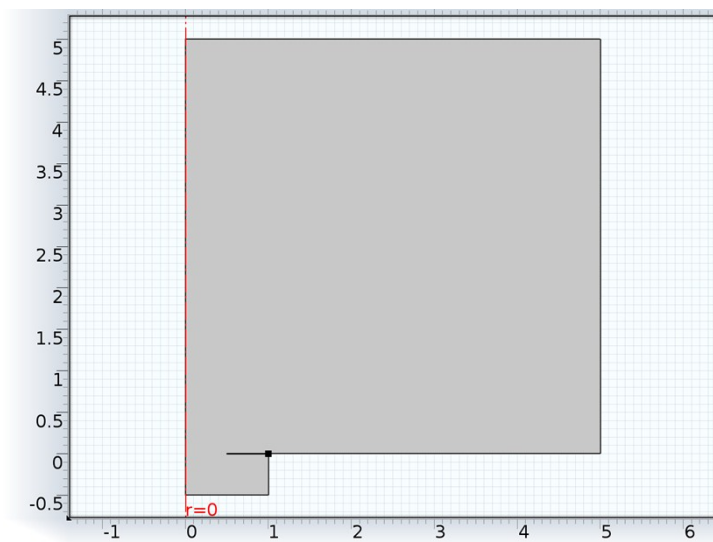

Geometry 1

##### Geometry statistics

| Property             | Value |
|----------------------|-------|
| Space dimension      | 2     |
| Number of domains    | 2     |
| Number of boundaries | 11    |

#### 3.2.1 Point 1 (pt1)

##### Selections of resulting entities

| Name             | Value  |
|------------------|--------|
| Point coordinate | {a, 0} |

### 3.2.2 Bézier Polygon 1 (b1)

#### Polygon segments

| Name                     | Value                                                                  |
|--------------------------|------------------------------------------------------------------------|
| Control points           | {{0, 0, R, R, a, a, 0}, {0, Z, Z, 0, 0, -h_p, -h_p}}                   |
| Degree                   | {1, 1, 1, 1, 1, 1}                                                     |
| Weights                  | {1, 1, 1, 1, 1, 1, 1, 1, 1, 1, 1, 1}                                   |
| Valid vertex coordinates | {{0, 0}, {0, 5}, {5, 5}, {5, 0}, {1, 0}, {1, -0.5}, {0, -0.5}, {0, 0}} |

### 3.2.3 Bézier Polygon 2 (b2)

#### Polygon segments

| Name                     | Value                                                    |
|--------------------------|----------------------------------------------------------|
| Control points           | {{a, top, top, a}, {0, 0, -h_top*3, -h_top*3}}           |
| Degree                   | {1, 1, 1}                                                |
| Weights                  | {1, 1, 1, 1, 1, 1}                                       |
| Valid vertex coordinates | {{1, 0}, {0.5, 0}, {0.5, -0.0060}, {1, -0.0060}, {1, 0}} |

## 3.3 Transport of Diluted Species (chds)

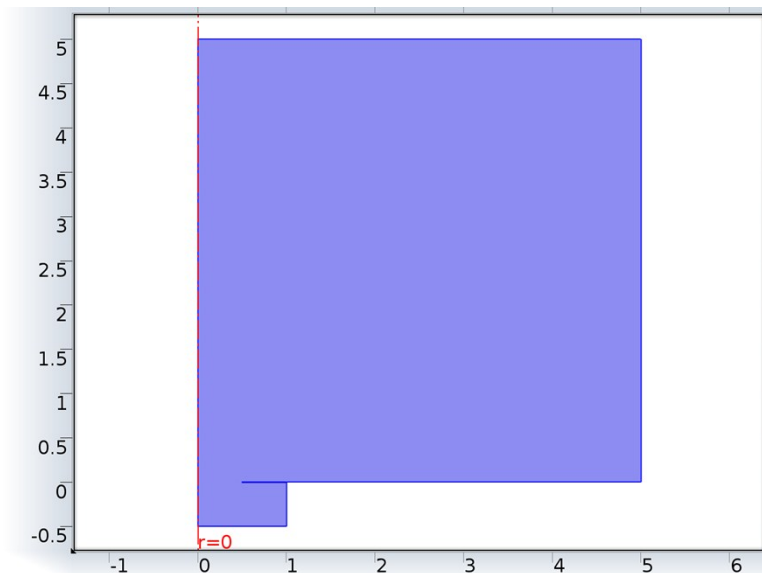

#### Transport of Diluted Species

##### Selection

|                        |          |
|------------------------|----------|
| Geometric entity level | Domain   |
| Selection              | Domain 1 |

##### Equations

$$\frac{\partial C_i}{\partial t} + \nabla \cdot (-D_i \nabla C_i) = R_i$$

$$\mathbf{N}_i = -D_i \nabla C_i$$

##### Settings

| Description                                          | Value  |
|------------------------------------------------------|--------|
| Concentration                                        | Linear |
| Compute boundary fluxes                              | 1      |
| Apply smoothing to boundary fluxes                   | 1      |
| Value type when using splitting of complex variables | Real   |

| Description                               | Value                   |
|-------------------------------------------|-------------------------|
| Equation form                             | Study controlled        |
| Migration in electric field               | 0                       |
| Convection                                | 0                       |
| Convective term                           | Non - conservative form |
| Equation residual                         | Approximate residual    |
| Streamline diffusion                      | 1                       |
| Crosswind diffusion                       | 1                       |
| Crosswind diffusion type                  | Do Carmo and Galeão     |
| Enable space-dependent physics interfaces | 0                       |
| Show equation assuming                    | std1/time               |

### 3.3.1 Diffusion

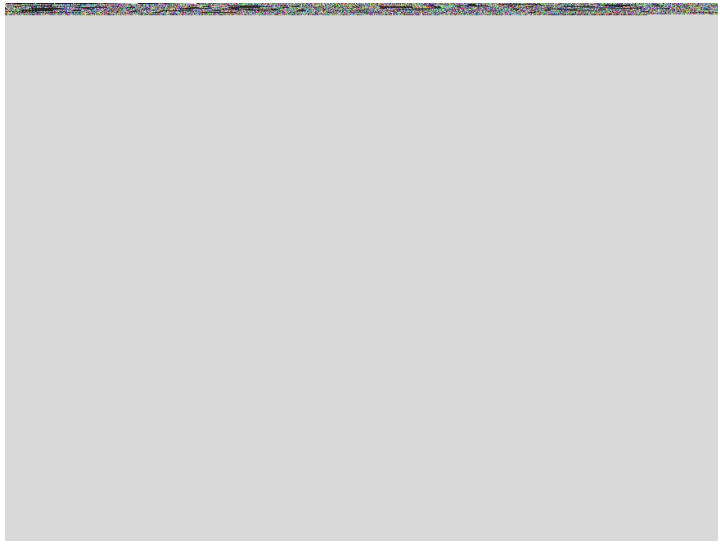

*Diffusion*

#### Selection

|                        |          |
|------------------------|----------|
| Geometric entity level | Domain   |
| Selection              | Domain 1 |

#### Equations

$$\frac{\partial c_i}{\partial t} + \nabla \cdot (-D_i \nabla c_i) = R_i$$

.....

$$\mathbf{N}_i = -D_i \nabla c_i$$

#### 3.3.1.1 Settings

##### Settings

| Description           | Value                                      |
|-----------------------|--------------------------------------------|
| Velocity field        | User defined                               |
| Velocity field        | {0, 0, 0}                                  |
| Electric potential    | User defined                               |
| Electric potential    | 0                                          |
| Diffusion coefficient | User defined                               |
| Diffusion coefficient | {{D_ad, 0, 0}, {0, D_ad, 0}, {0, 0, D_ad}} |
| Bulk material         | None                                       |

### 3.3.1.2 Variables

| Name              | Expression                                                                | Description                             | Selection             |
|-------------------|---------------------------------------------------------------------------|-----------------------------------------|-----------------------|
| chds.Drr_ch2      | D_ad                                                                      | Diffusion coefficient, rr component     | Domain 1              |
| chds.Dphir_ch2    | 0                                                                         | Diffusion coefficient, phir component   | Domain 1              |
| chds.Dzr_ch2      | 0                                                                         | Diffusion coefficient, zr component     | Domain 1              |
| chds.Drphi_ch2    | 0                                                                         | Diffusion coefficient, rphi component   | Domain 1              |
| chds.Dphiphi_ch2  | D_ad                                                                      | Diffusion coefficient, phiphi component | Domain 1              |
| chds.Dzphi_ch2    | 0                                                                         | Diffusion coefficient, zphi component   | Domain 1              |
| chds.Drz_ch2      | 0                                                                         | Diffusion coefficient, rz component     | Domain 1              |
| chds.Dphiz_ch2    | 0                                                                         | Diffusion coefficient, phiz component   | Domain 1              |
| chds.Dzz_ch2      | D_ad                                                                      | Diffusion coefficient, zz component     | Domain 1              |
| chds.Dav_ch2      | $0.5*(chds.Drr\_ch2+chds.Dzz\_ch2)$                                       | Average diffusion coefficient           | Domain 1              |
| chds.tfluxr_ch2   | $-chds.Drr\_ch2*ch2r - chds.Drz\_ch2*ch2z$                                | Total flux, r component                 | Domain 1              |
| chds.tfluxphi_ch2 | $-chds.Dphir\_ch2*ch2r - chds.Dphiz\_ch2*ch2z$                            | Total flux, phi component               | Domain 1              |
| chds.tfluxz_ch2   | $-chds.Dzr\_ch2*ch2r - chds.Dzz\_ch2*ch2z$                                | Total flux, z component                 | Domain 1              |
| chds.dfluxr_ch2   | $-chds.Drr\_ch2*ch2r - chds.Drz\_ch2*ch2z$                                | Diffusive flux, r component             | Domain 1              |
| chds.dfluxphi_ch2 | $-chds.Dphir\_ch2*ch2r - chds.Dphiz\_ch2*ch2z$                            | Diffusive flux, phi component           | Domain 1              |
| chds.dfluxz_ch2   | $-chds.Dzr\_ch2*ch2r - chds.Dzz\_ch2*ch2z$                                | Diffusive flux, z component             | Domain 1              |
| chds.gradr_ch2    | ch2r                                                                      | Concentration gradient, r component     | Domain 1              |
| chds.gradphi_ch2  | 0                                                                         | Concentration gradient, phi component   | Domain 1              |
| chds.gradz_ch2    | ch2z                                                                      | Concentration gradient, z component     | Domain 1              |
| chds.ntflux_ch2   | chds.bndFlux_ch2                                                          | Normal total flux                       | Boundaries 1–8, 10–11 |
| chds.ndflux_ch2   | chds.bndFlux_ch2                                                          | Normal diffusive flux                   | Boundaries 1–8, 10–11 |
| chds.dfluxMag_ch2 | $\sqrt{chds.dfluxr\_ch2^2+chds.dfluxphi\_ch2^2+chds.dfluxz\_ch2^2}$       | Diffusive flux magnitude                | Domain 1              |
| chds.tfluxMag_ch2 | $\sqrt{chds.tfluxr\_ch2^2+chds.tfluxphi\_ch2^2+chds.tfluxz\_ch2^2}$       | Total flux magnitude                    | Domain 1              |
| chds.Res_ch2      | -chds.R_ch2                                                               | Equation residual                       | Domain 1              |
| domflux.ch2r      | chds.dfluxr_ch2                                                           | Domain flux                             | Domain 1              |
| domflux.ch2z      | chds.dfluxphi_ch2                                                         | Domain flux                             | Domain 1              |
| chds.nrc          | $\text{root.nrc}/\sqrt{(\text{root.nrc}^2+\text{root.nzc}^2+\text{eps})}$ | Normal vector, r component              | Boundaries 1–8, 10–11 |
| chds.nphic        | 0                                                                         | Normal vector, phi component            | Boundaries 1–8, 10–11 |
| chds.nzc          | $\text{root.nzc}/\sqrt{(\text{root.nrc}^2+\text{root.nzc}^2+\text{eps})}$ | Normal vector, z component              | Boundaries 1–8, 10–11 |

| Name             | Expression                                                                   | Description   | Selection                |
|------------------|------------------------------------------------------------------------------|---------------|--------------------------|
|                  | 2+eps)                                                                       | component     | 1–8, 10–11               |
| chds.bndFlux_ch2 | -uflux_spatial(ch2)                                                          | Boundary flux | Boundaries 5–7           |
| chds.bndFlux_ch2 | if(r>0.0010/sqrt(sqrt(mean(emetric 2))),- 0.5*dflux_spatial(ch2)/(r*pi),NaN) | Boundary flux | Boundaries 1–4, 8, 10–11 |

### 3.3.1.3 Shape functions

| Name | Shape function    | Unit | Description   | Shape frame | Selection |
|------|-------------------|------|---------------|-------------|-----------|
| ch2  | Lagrange (Linear) |      | Concentration | Material    | Domain 1  |

### 3.3.1.4 Weak expressions

| Weak expression                                                                                                                  | Integration frame | Selection |
|----------------------------------------------------------------------------------------------------------------------------------|-------------------|-----------|
| 2*(-d(ch2,t)*test(ch2)- (chds.Drr_ch2*ch2r+chds.Drz_ch2*ch2z)*test(ch2r)- (chds.Dzr_ch2*ch2r+chds.Dzz_ch2*ch2z)*test(ch2z))*pi*r | Material          | Domain 1  |
| 2*chds.streamline*pi*r                                                                                                           | Material          | Domain 1  |
| 2*chds.crosswind*pi*r                                                                                                            | Material          | Domain 1  |

## 3.3.2 Axial Symmetry 1

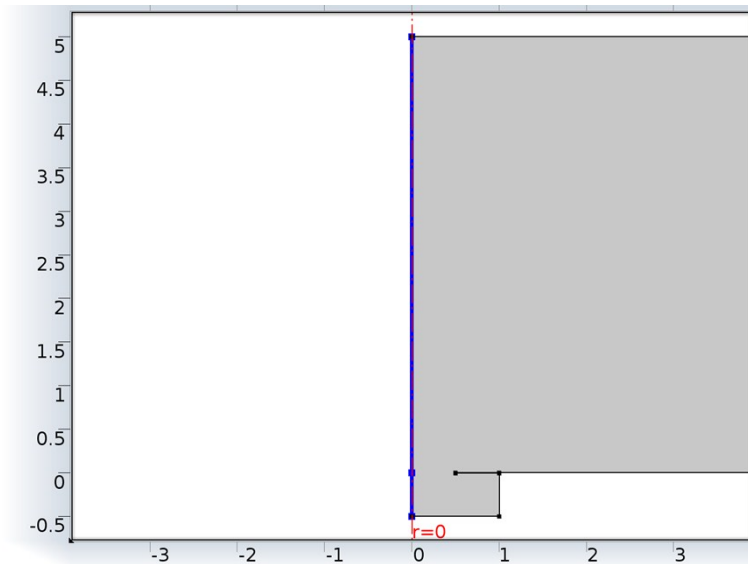

*Axial Symmetry 1*

#### Selection

|                        |                 |
|------------------------|-----------------|
| Geometric entity level | Boundary        |
| Selection              | Boundaries 1, 3 |

3.3.3 No Flux 1

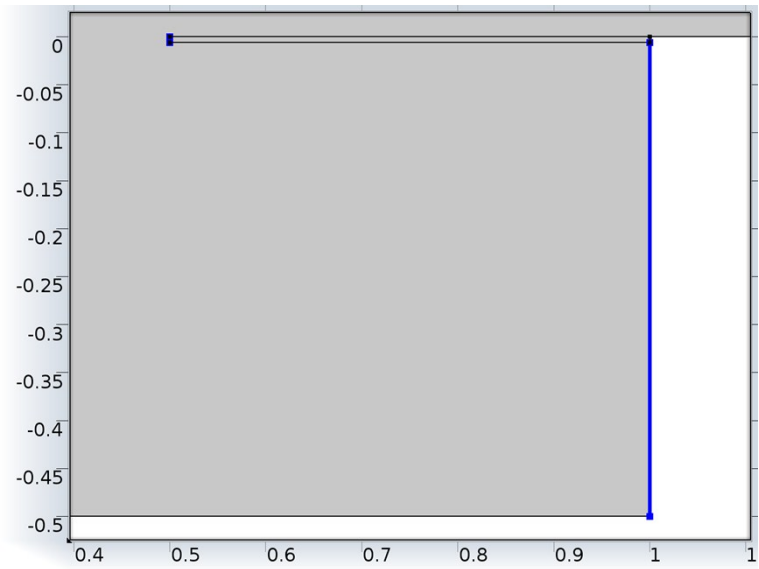

No Flux 1

Selection

|                        |                 |
|------------------------|-----------------|
| Geometric entity level | Boundary        |
| Selection              | Boundaries 5, 8 |

Equations

$$-\mathbf{n} \cdot \mathbf{N}_i = 0$$

3.3.3.1 Settings

Settings

| Description           | Value                 |
|-----------------------|-----------------------|
| Apply for all species | Apply for all species |

3.3.4 Initial Values 1

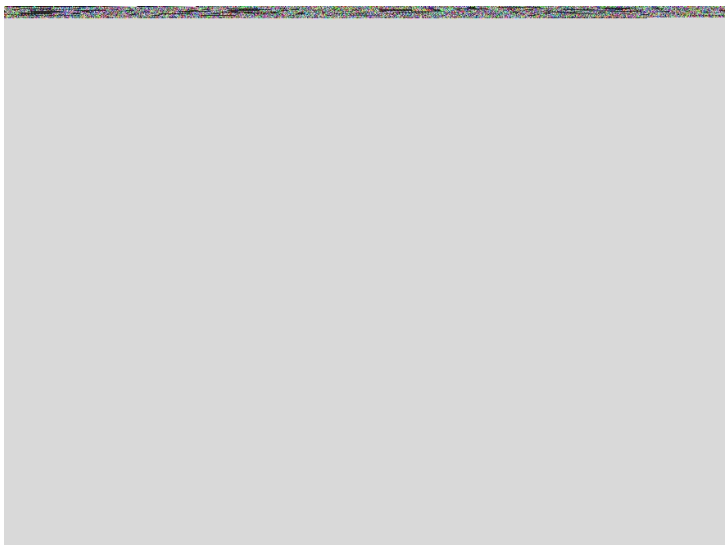

Initial Values 1



#### Selection

|                        |          |
|------------------------|----------|
| Geometric entity level | Domain   |
| Selection              | Domain 1 |

#### 3.3.4.1 Settings

##### Settings

| Description   | Value |
|---------------|-------|
| Concentration | 0     |

#### 3.3.5 Concentration 1

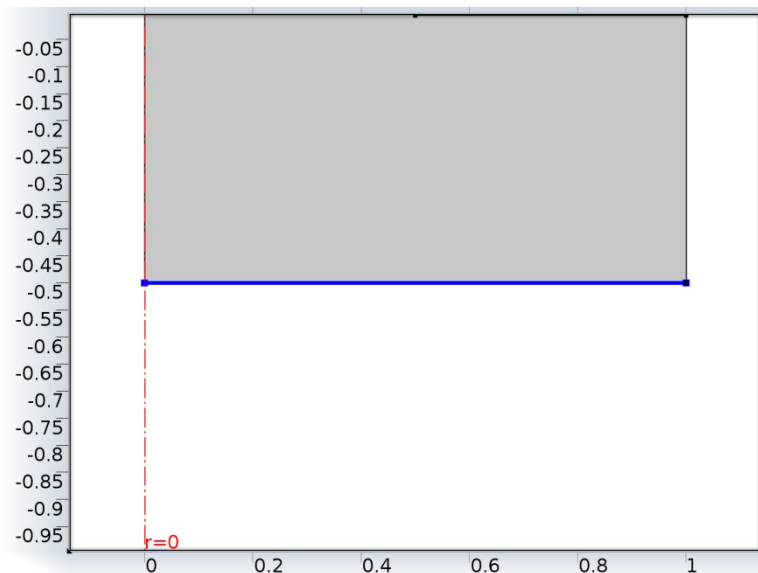

#### Concentration 1

#### Selection

|                        |            |
|------------------------|------------|
| Geometric entity level | Boundary   |
| Selection              | Boundary 2 |

#### Equations

$$C_i = C_{0i}$$

#### 3.3.5.1 Settings

##### Settings

| Description             | Value                   |
|-------------------------|-------------------------|
| Concentration           | 1                       |
| Species ch2             | 1                       |
| Apply reaction terms on | All physics (symmetric) |
| Use weak constraints    | 0                       |

#### 3.3.5.2 Variables

| Name        | Expression | Unit | Description   | Selection  |
|-------------|------------|------|---------------|------------|
| chds.c0_ch2 | 1          |      | Concentration | Boundary 2 |

#### 3.3.5.3 Constraints

| Constraint       | Constraint force       | Shape function    | Selection  |
|------------------|------------------------|-------------------|------------|
| -ch2+chds.c0_ch2 | test(-ch2+chds.c0_ch2) | Lagrange (Linear) | Boundary 2 |

3.3.6 Concentration 2

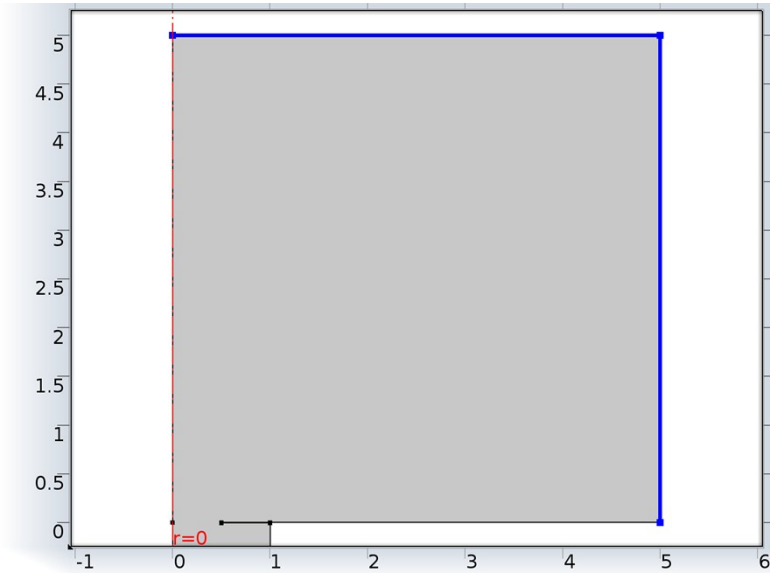

Concentration 2

Selection

|                        |                  |
|------------------------|------------------|
| Geometric entity level | Boundary         |
| Selection              | Boundaries 4, 11 |

Equations

$$c_i = c_{0i}$$

3.3.6.1 Settings

Settings

| Description             | Value                   |
|-------------------------|-------------------------|
| Concentration           | 0                       |
| Species cH2             | 1                       |
| Apply reaction terms on | All physics (symmetric) |
| Use weak constraints    | 0                       |

3.3.6.2 Variables

| Name        | Expression | Unit | Description   | Selection        |
|-------------|------------|------|---------------|------------------|
| chds.c0_ch2 | 0          |      | Concentration | Boundaries 4, 11 |

3.3.6.3 Constraints

| Constraint       | Constraint force       | Shape function    | Selection        |
|------------------|------------------------|-------------------|------------------|
| -cH2+chds.c0_ch2 | test(-cH2+chds.c0_ch2) | Lagrange (Linear) | Boundaries 4, 11 |

3.3.7 Concentration 3

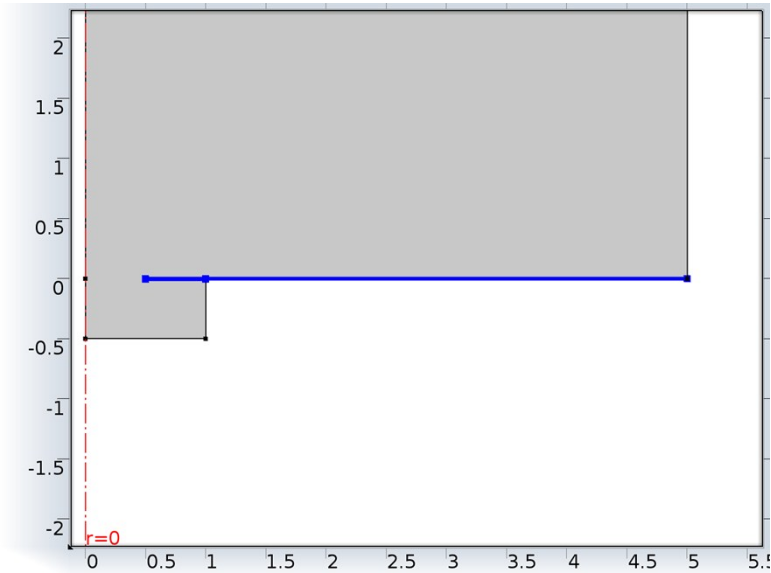

Concentration 3

Selection

|                        |                    |
|------------------------|--------------------|
| Geometric entity level | Boundary           |
| Selection              | Boundaries 6–7, 10 |

Equations

$$c_i = c_{0i}$$

3.3.7.1 Settings

Settings

| Description             | Value                   |
|-------------------------|-------------------------|
| Concentration           | 0                       |
| Species cH2             | 1                       |
| Apply reaction terms on | All physics (symmetric) |
| Use weakconstraints     | 0                       |

3.3.7.2 Variables

| Name        | Expression | Unit | Description   | Selection          |
|-------------|------------|------|---------------|--------------------|
| chds.c0_ch2 | 0          |      | Concentration | Boundaries 6–7, 10 |

3.3.7.3 Constraints

| Constraint       | Constraint force       | Shape function    | Selection          |
|------------------|------------------------|-------------------|--------------------|
| -cH2+chds.c0_ch2 | test(-cH2+chds.c0_ch2) | Lagrange (Linear) | Boundaries 6–7, 10 |

3.4 Mesh 1

Mesh statistics

| Property                | Value  |
|-------------------------|--------|
| Minimum element quality | 0.6981 |
| Average element quality | 0.9453 |
| Triangular elements     | 4445   |
| Edge elements           | 358    |
| Vertex elements         | 10     |

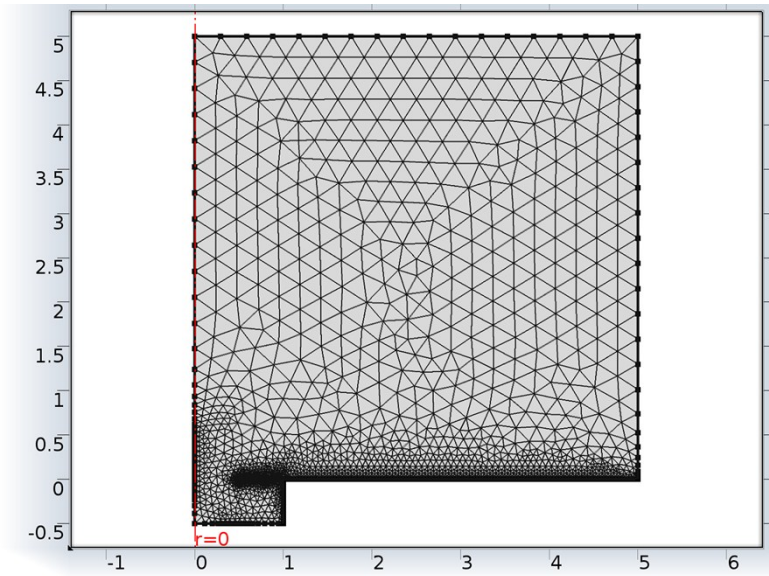

Mesh 1

3.4.1 Size (size)

Settings

| Name                        | Value   |
|-----------------------------|---------|
| Maximum element size        | 0.292   |
| Minimum element size        | 0.00165 |
| Resolution of curvature     | 0.3     |
| Maximum element growth rate | 1.3     |
| Predefined size             | Fine    |

3.4.2 Free Triangular 1 (ftri1)

Selection

|                        |           |
|------------------------|-----------|
| Geometric entity level | Domain    |
| Selection              | Remaining |

3.4.2.1 Size 1 (size1)

Selection

|                        |         |
|------------------------|---------|
| Geometric entity level | Point   |
| Selection              | Point 8 |

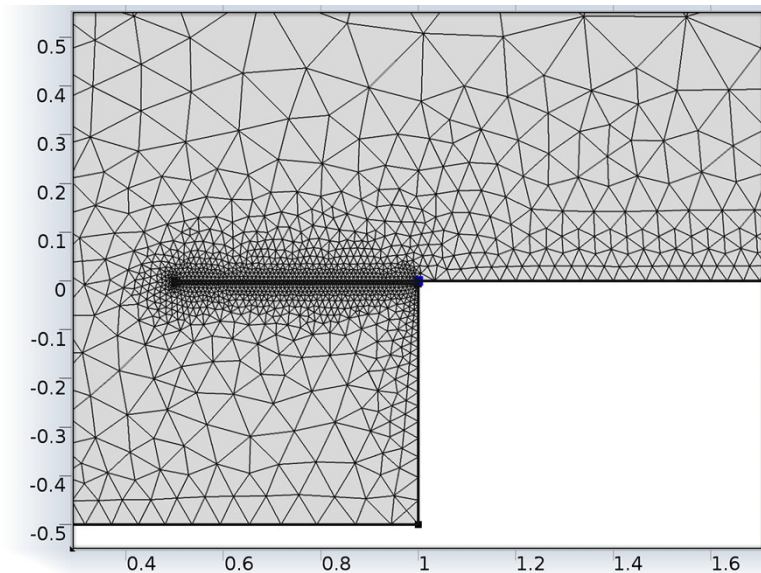

Size 1

#### Settings

| Name                    | Value          |
|-------------------------|----------------|
| Maximum element size    | 0.055          |
| Minimum element size    | 1.1E-4         |
| Resolution of curvature | 0.2            |
| Predefined size         | Extremely fine |

#### 3.4.2.2 Distribution 1 (dis1)

##### Selection

|                        |             |
|------------------------|-------------|
| Geometric entity level | Boundary    |
| Selection              | Boundary 10 |

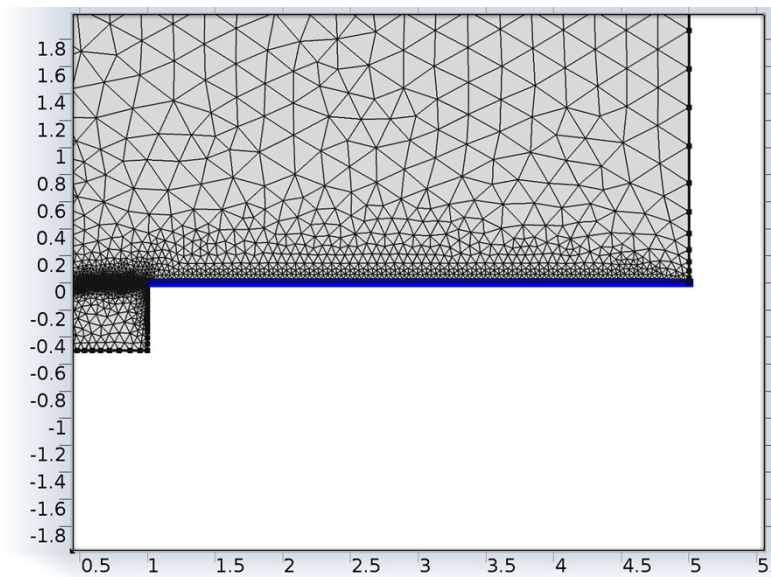

Distribution 1

#### Settings

| Name                    | Value                        |
|-------------------------|------------------------------|
| Distribution properties | Predefined distribution type |
| Number of elements      | 120                          |
| Distribution method     | Geometric sequence           |

#### 3.4.2.3 Size 2 (size2)

##### Selection

|                        |                |
|------------------------|----------------|
| Geometric entity level | Boundary       |
| Selection              | Boundaries 6–7 |

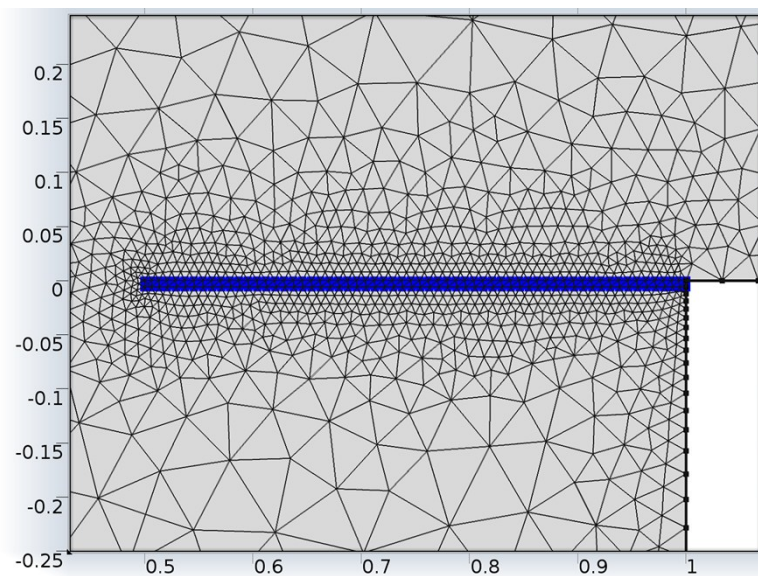

#### Size 2

##### Settings

| Name                    | Value          |
|-------------------------|----------------|
| Maximum element size    | 0.055          |
| Minimum element size    | 1.1E-4         |
| Resolution of curvature | 0.2            |
| Predefined size         | Extremely fine |
